# Supplementary figures and images for: Proof-of-Principle Study of Inflammasome Signaling Proteins as Diagnostic Biomarkers of the Inflammatory Response in Parkinson’s Disease
Source: MDPI journal article supplement (doi:10.3390/ph16060883), 2023-06-15

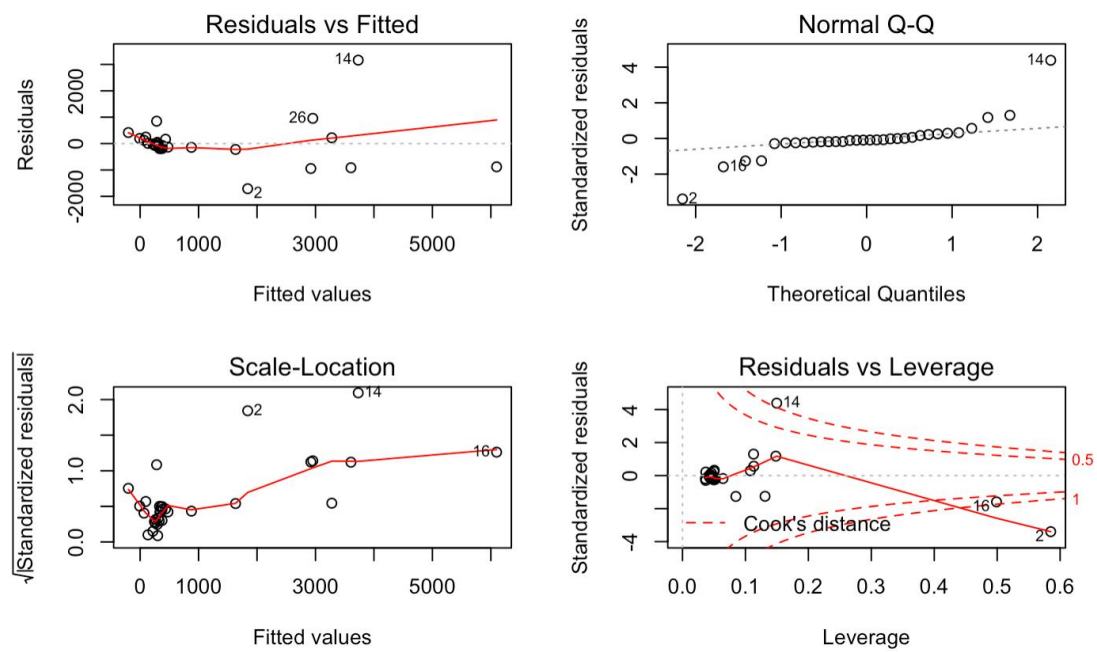

**Figure S1.** Residual analysis results for the model IL-18-Caspase-1 + ASC.

Supplement: s1 [file s1]
